# Supplementary material
Source: publisher figshare collection journal article supplement (https://geolsoc.figshare.com/ndownloader/files/25672638)
Supplement: Supplementary file 1 [file 25672638]

Reference	Sample	SiO2	TiO2	Al2O3	Fe2O3(T)	MnO	MgO	CaO	Na2O	K2O	P2O5	LOI	Total	Li	Sc	V	Cr	Co	Ni	Cu	Zn	Rb	Sr	Y	Zr	Nb	Mo	Sb	Cs	Ba	La	Ce	Pr	Nd	Sm	Eu	Gd	Tb	Dy	Ho	Er	Yb	Lu	Hf	Ta	Tl	Pb	Th	U
Wei et al. 2017	ASKL-3	54.11	1.83	14.57	7.75	0.11	5.31	5.46	3.18	3.97	0.99	2.91	100.20	41.2	14.5	105.1	78.5	20.0	49.3	19.8	131.3	120.4	1386.1	34.4	519.7	47.0	2.50	0.23	3.22	2143.6	158.5	304.9	32.5	126.9	19.3	4.05	11.3	1.47	6.58	1.10	2.62	2.14	0.31	10.5	1.11	8.26	66.3	27.6	5.67
Wei et al. 2017	ASKL-4	54.52	1.98	14.43	7.66	0.11	4.12	6.56	3.08	4.07	1.10	1.48	99.14	33.4	6.3	107.7	66.1	19.7	43.9	20.8	126.1	125.2	1432.8	31.8	555.0	51.3	2.65	0.09	3.27	2348.1	168.7	329.3	35.9	137.7	21.1	4.33	12.2	1.51	6.60	1.07	2.51	1.87	0.26	11.5	1.32	0.66	39.6	23.2	5.87
Wei et al. 2017	518-05	54.67	2.01	14.49	7.75	0.11	3.99	6.62	3.12	4.19	1.14	0.96	99.06	29.0	9.7	107.4	66.2	19.3	45.8	20.0	127.0	126.0	1431.7	32.6	549.3	50.0	2.66	0.08	2.92	2322.3	174.4	336.5	36.4	139.5	21.5	4.38	12.3	1.54	6.69	1.08	2.50	1.86	0.26	11.5	1.14	0.73	41.2	29.0	5.47
Wei et al. 2017	ASKL-10	55.01	2.21	14.59	7.78	0.11	3.03	6.39	3.25	4.00	1.23	1.45	99.08	33.6	10.9	98.8	24.6	16.6	13.7	18.8	142.7	142.8	1247.3	35.2	703.0	63.4	3.04	0.07	2.55	2169.0	191.0	366.9	39.0	146.5	22.3	4.41	12.9	1.61	7.10	1.14	2.65	1.96	0.28	14.3	1.59	0.81	41.1	28.3	5.59
Wei et al. 2017	513-11	58.95	1.62	14.97	6.67	0.09	3.35	5.24	3.40	4.30	0.75	1.27	100.60	61.6	11.0	92.2	49.2	17.5	41.2	26.4	117.6	195.1	885.2	32.1	520.7	53.5	2.93	0.11	9.42	1620.4	166.1	311.3	32.8	121.8	18.0	3.18	10.4	1.36	6.07	1.00	2.37	1.85	0.26	10.7	1.38	0.15	36.2	35.9	8.39
Wei et al. 2017	516-19	55.90	2.18	14.77	8.45	0.12	4.10	6.50	3.11	3.62	1.15	0.60	100.50	26.2	9.0	112.7	71.5	20.6	43.7	25.2	143.7	111.4	1012.1	35.5	612.7	57.8	2.87	0.05	1.90	1846.3	158.3	310.1	33.0	127.3	19.9	4.11	12.0	1.57	7.21	1.22	2.93	2.32	0.34	12.6	1.57	0.64	33.7	19.9	4.51
Wei et al. 2017	518-09	57.12	1.89	14.65	7.28	0.10	3.47	5.63	3.14	4.43	1.01	1.01	99.76	37.9	11.2	97.9	52.9	17.5	35.0	20.9	133.1	158.6	1203.4	32.9	560.6	51.9	2.90	0.08	4.24	2204.8	174.2	335.4	36.0	137.2	21.2	4.18	12.1	1.54	6.66	1.08	2.51	1.87	0.26	12.1	1.23	0.95	42.7	35.0	5.76
Wei et al. 2017	ASKL-6	54.33	2.05	14.78	7.46	0.10	2.96	5.88	3.05	3.97	1.10	3.70	99.40	31.7	11.0	98.9	26.3	16.4	13.7	10.2	138.7	135.5	1129.9	33.2	561.8	10.5		0.36	3.80	2074.4	175.2	334.0	36.5	132.0	20.7	4.08	12.4	1.50	6.67	1.12	2.57	1.97	0.28	10.8	0.30	0.29	39.0	27.2	4.88
Wei et al. 2017	ASKL-7	53.78	2.15	14.44	7.57	0.11	3.44	6.26	3.19	3.98	1.19	2.86	99.01	30.8	8.1	74.0	14.8	12.0	10.4	17.7	105.1	111.5	874.3	26.6	530.1	47.1	2.29	0.09	2.25	1739.7	141.9	273.1	29.4	110.4	16.8	3.33	9.7	1.24	5.38	0.87	2.04	1.52	0.22	10.7	1.03	0.15	31.4	22.2	4.67
Wei et al. 2017	ASKL-8	57.07	2.12	14.89	7.52	0.10	2.86	5.71	3.27	4.20	1.15	1.03	99.96	27.1	8.9	78.7	19.0	12.5	9.9	13.7	114.4	133.8	956.2	29.6	601.9	52.9	2.65	0.07	2.76	1799.9	164.8	314.9	33.2	125.5	18.4	3.57	10.6	1.33	5.87	0.95	2.19	1.65	0.23	11.7	1.15	1.96	28.3	26.3	5.11
Wei et al. 2017	ASKL-9	54.82	2.17	14.67	7.65	0.11	3.14	6.16	3.24	3.95	1.19	2.68	99.82	23.7	10.7	98.5	22.9	16.9	14.6	16.9	146.0	142.7	1400.2	33.8	610.1	14.3		0.10	2.69	2136.1	188.3	362.0	39.2	142.6	22.0	4.35	13.2	1.60	6.91	1.14	2.58	1.96	0.27	12.0	0.33	0.62	42.1	28.9	5.65
Wei et al. 2017	ASKL-12	58.76	1.36	14.19	6.12	0.09	3.16	5.97	2.88	4.41	0.69	2.99	100.60	34.5	10.7	78.4	75.3	13.5	24.0	14.3	112.4	171.4	785.7	30.8	411.0	46.2	2.72	0.10	5.07	1570.5	149.6	284.8	29.8	111.3	16.5	2.91	9.7	1.27	5.81	0.96	2.31	1.81	0.26	8.6	1.08	1.29	42.2	33.3	6.41
Wei et al. 2017	ASKL-14	54.07	1.87	14.16	8.11	0.12	4.83	7.20	2.92	3.68	1.01	1.20	99.20	26.5	9.4	114.7	103.7	22.9	58.5	26.5	125.2	112.1	1192.6	33.2	521.2	49.0	2.65	0.06	2.35	1814.2	149.5	289.3	30.7	119.1	18.4	3.80	11.0	1.46	6.64	1.13	2.71	2.18	0.32	10.8	1.56	0.83	33.3	19.9	5.14
Wei et al. 2017	ASKL-15	55.76	1.76	14.11	7.40	0.11	3.94	6.78	2.95	3.94	0.91	1.54	99.23	29.7	8.8	100.5	73.7	20.6	57.7	23.8	121.3	137.9	1853.3	32.7	549.1	50.5	2.80	0.07	3.40	1812.7	153.2	293.7	31.6	119.3	18.2	3.53	10.8	1.41	6.32	1.06	2.57	1.99	0.28	11.0	1.13	0.76	35.9	23.7	6.09
Wei et al. 2017	ASKL-16	55.69	1.73	14.00	7.51	0.11	4.08	6.85	2.89	3.74	0.88	1.49	99.01	33.6	11.1	103.5	88.9	19.2	38.4	19.3	125.0	138.8	944.5	34.0	494.0	49.8	2.76	0.07	3.49	1655.7	155.7	300.8	31.9	121.7	18.5	3.48	11.0	1.44	6.65	1.12	2.66	2.14	0.30	10.5	1.13	0.76	35.8	27.1	5.29
Wei et al. 2017	515-01	59.48	1.61	14.14	5.96	0.08	2.24	5.30	3.23	4.47	0.83	1.95	99.31	65.3	8.4	69.2	23.8	11.8	11.5	15.5	128.3	214.2	821.0	30.1	518.5	58.7	3.13	0.12	10.57	1519.4	158.6	308.8	32.6	121.0	18.7	3.18	10.8	1.39	6.13	0.98	2.30	1.73	0.24	11.1	1.55	1.25	42.7	41.0	10.73
Wei et al. 2017	WLK-3	58.75	2.14	14.93	7.73	0.11	2.93	5.15	3.31	4.34	1.16	0.26	100.80	45.6	10.4	92.5	32.5	16.3	22.8	22.1	146.2	150.9	954.0	33.9	647.9	63.9	3.10	0.08	4.28	1815.7	173.7	338.9	35.9	137.8	21.2	4.07	12.3	1.58	6.97	1.12	2.56	1.92	0.27	13.3	1.49	0.62	37.0	29.3	5.98
Wei et al. 2017	516-02	55.45	1.74	13.75	7.67	0.11	4.36	6.93	2.83	3.76	0.89	1.38	98.91	33.1	13.6	109.4	95.6	20.2	51.5	23.6	125.4	133.6	911.3	33.5	509.5	48.9	2.72	0.07	3.38	1619.2	149.6	290.3	30.7	117.5	18.2	3.49	10.9	1.46	6.59	1.11	2.66	2.13	0.31	10.5	1.12	0.78	34.2	27.9	5.51
Wei et al. 2017	516-22	55.43	2.13	14.60	8.30	0.12	4.03	6.49	3.04	3.65	1.12	0.57	99.51	29.3	13.0	110.0	71.2	20.1	46.4	25.9	167.4	111.5	1024.9	35.7	586.0	54.8	2.77	0.07	1.92	1787.1	154.9	299.7	32.2	123.3	19.3	3.96	11.7	1.52	7.01	1.19	2.87	2.27	0.33	12.2	1.21	0.60	32.3	22.5	4.51
Wei et al. 2017	ASKL-5	55.07	2.13	14.74	7.51	0.10	3.14	6.30	3.30	4.03	1.16	1.50	99.02	30.1	10.0	94.5	19.9	15.3	10.4	15.4	136.8	142.0	1499.3	32.0	587.7	21.1		0.16	3.09	2114.6	182.6	351.7	37.8	138.7	21.2	4.12	12.6	1.52	6.69	1.11	2.50	1.91	0.27	11.6	0.69	0.73	40.7	28.6	5.69
Wei et al. 2017	516-11	50.37	1.73	13.39	7.70	0.10	5.74	7.83	2.91	3.72	0.89	3.21	97.65	21.1	12.8	104.3	141.8	26.5	122.4	24.5	111.9	104.3	1451.5	27.0	402.2	46.3		0.15	2.24	1753.3	122.6	236.0	25.7	97.4	15.4	3.37	9.8	1.21	5.53	0.95	2.16	1.71	0.24	7.2	1.89	0.42	20.9	15.5	3.04
Wei et al. 2017	516-12	47.30	1.53	12.69	6.92	0.09	4.88	9.39	2.95	3.48	0.77	5.93	95.98	26.0	11.7	82.7	126.8	23.7	118.4	41.8	95.9	106.3	1333.9	26.7	419.1	42.8	2.09	0.12	2.41	1589.9	113.0	217.0	23.4	89.7	14.0	3.08	8.5	1.11	5.09	0.85	2.03	1.59	0.23	8.3	0.95	0.64	23.5	16.8	3.36
Wei et al. 2017	518-14	55.73	2.17	14.36	7.65	0.10	3.07	5.69	3.21	4.13	1.19	1.64	98.95	35.5	9.8	95.0	37.2	16.2	21.2	18.1	145.8	140.1	1062.1	33.1	669.4	64.3	3.09	0.08	3.45	1956.0	169.2	333.5	35.7	137.3	21.4	4.20	12.5	1.59	6.92	1.11	2.55	1.88	0.26	13.7	1.54	0.96	41.2	25.9	5.45
Wei et al. 2017	ASKL-17	48.08	2.22	14.74	10.04	0.14	7.40	7.67	3.87	4.30	1.12	0.41	100.10	18.6	5.0	145.5	141.3	36.9	121.6	32.6	110.5	95.0	1411.4	23.4	354.8	58.8	4.01	0.15	3.57	1590.2	88.3	174.2	19.5	79.5	13.2	3.40	8.6	1.14	5.38	0.89	2.05	1.50	0.21	7.3	1.59	0.29	20.1	10.2	4.29
Wei et al. 2017	ASKL-18	45.91	2.14	14.27	9.55	0.13	7.09	8.58	3.65	3.95	1.07	3.52	99.93	15.6	13.4	141.2	131.5	35.6	106.6	31.0	108.8	92.8	1656.7	25.7	301.7	45.0		0.27	3.40	1540.0	85.1	166.3	19.1	73.5	13.0	3.25	8.8	1.11	5.14	0.87	1.99	1.45	0.20	6.2	1.25	0.28	20.3	13.4	5.33
Yu et al.2020	XS-1	46.88	2.08	13.97	9.31	0.14	6.71	8.92	3.75	4.05	1.05	3.48	100.33	12.7	9.1	109.8	95.2	26.5	80.3	30.7	90.0	72.7	1191.2	16.5	260.4	42.4	3.24		2.51	1214.2	64.5	137.4	14.6	61.8	10.0	2.65	9.7	0.89	4.10	0.61	1.71	1.25	0.16	5.6	3.32		13.6	10.3	3.37
Yu et al.2020	XS-2	47.84	2.11	14.09	9.53	0.14	7.03	8.15	3.81	4.09	1.05	2.47	100.30	16.7	12.4	149.7	140.1	34.4	111.6	37.4	144.8	97.7	1613.4	21.7	350.0	55.0	4.25		3.34	1596.0	86.0	191.4	19.4	81.8	13.4	3.51	12.9	1.19	5.47	0.81	2.31	1.65	0.21	7.6	4.23		18.3	13.5	4.37
Yu et al.2020	XS-3	47.61	2.19	14.35	9.85	0.14	7.37	7.33	3.89	4.10	1.10	2.43	100.34	17.3	12.2	152.5	134.0	35.5	113.6	37.5	112.9	95.1	1555.4	22.1	352.8	56.7	4.35		3.27	1610.6	89.0	195.5	19.9	84.1	13.7	3.61	13.2	1.21	5.63	0.82	2.33	1.68	0.21	7.5	4.30		17.5	13.6	4.48
Yu et al.2020	ASKL-13	54.11	1.85	13.70	8.13	0.12	4.94	7.49	2.85	3.43	0.97	2.76	100.36	22.0	13.1	125.6	118.6	22.6	46.9	29.4	135.2	109.7	1218.8	27.3	504.2	46.2	2.75		2.21	1843.4	155.4	315.6	31.2	124.2	18.2	4.01	18.3	1.52	6.63	1.00	3.02	2.30	0.30	10.6	2.88		26.7	22.5	3.68
Yu et al.2020	517-B-02	58.80	2.07	14.26	8.24	0.09	2.28	4.70	3.13	4.16	0.99	1.19	99.91	42.1	9.2	100.4	21.4	12.7	8.8	19.8	136.3	175.6	987.8	25.8	791.8	64.8	34.60		3.48	1770.2	196.0	412.6	41.2	161.4	23.8	4.42	22.2	1.77	7.22	1.00	2.99	2.17	0.27	16.3	3.93		35.6	32.0	13.79
Yu et al.2020	WLK-1	58.47	2.15	14.18	7.96	0.11	2.86	5.08	3.15	4.09	1.10	1.02	100.16	39.7	9.6	97.2	31.6	15.5	18.9	29.5	127.8	167.7	1084.6	28.0	651.8	63.6	3.50		5.03	1815.4	185.5	378.8	37.2	147.8	21.5	4.25	21.2	1.71	7.17	1.03	3.02	2.10	0.26	13.7	4.20		30.5	30.2	5.87
Yu et al.2020	519-06	58.92	1.43	13.93	6.08	0.08	2.71	5.39	3.08	4.16	0.65	3.41	99.86	53.5	9.0	84.2	42.6	15.8	35.5	59.3	147.8	190.7	1020.4	24.3	520.6	50.9	3.50		9.73	1477.2	152.9	303.6	29.1	113.1	16.4	3.11	16.4	1.35	5.84	0.86	2.60	1.96	0.25	11.3	3.68		36.9	34.9	7.50
Yu et al.2020	516-03	56.19	1.92	14.07	7.63	0.12	3.65	6.64	2.94	3.59	0.94	2.58	100.27	27.0	11.9	112.5	74.5	17.8	37.6	32.7	157.6	129.9	996.0	29.1	614.6	51.6	3.20		2.55	1790.2	166.3	340.0	32.9	131.0	18.9	3.93	19.1	1.60	6.94	1.05	3.15	2.42	0.31	12.6	3.02		29.7	24.7	4.62
Yu et al.2020	517-B-05	65.40	1.22	14.00	4.82	0.07	1.48	3.31	3.31	4.50	0.54	1.33	99.97	106.7	6.9	57.4	13.0	8.0	6.5	18.2	102.1	357.8	553.2	28.6	493.8	59.1	3.65		25.02	1084.0	138.1	285.6	27.6	106.6	16.1	2.58	16.1	1.44	6.56	0.99	2.99	2.54	0.32	11.4	5.85		44.5	41.6	14.44
Yu et al.2020	517-B-03	70.70	0.28	13.56	1.73	0.05	0.31	2.53	3.43	4.94	0.11	2.36	100.00	179.5	3.5	9.5	1.7	2.0	1.0	4.6	45.2	508.8	169.1	29.0	125.2	48.3	1.96		47.38	388.2	60.2	129.1	12.6	47.8	8.6	0.90	8.9	1.00	5.54	0.90	2.83	2.90	0.37	4.3	6.81		54.7	42.1	22.48
Guo et al.2014	AH607	47.90	1.90	13.91	10.79	0.18	7.31	9.21	3.53	4.35	0.93	0.82	100.83		24.2	162.3	171.6	39.4	115.3	35.8	117.4	98.5	1376.0	19.4	317.0	55.9				1675.0	137.7	312.8	37.2	126.1	18.9	4.73	13.6	1.36	5.84	0.95	2.38	1.86	0.33	10.6	3.18		37.4	15.1	3.79
Guo et al.2014	AH605	46.15	2.39	13.78	11.43	0.16	8.52	8.28	3.49	4.74	1.06	1.57	101.57		23.7	234.9	205.1	32.8	109.7	37.6	125.0	113.2	1528.0	23.6	289.0	48.3				2003.0	97.3	174.2	19.5	60.8	13.6	3.37	7.9	0.84	4.79	0.99	2.95	2.63	0.38	8.5	2.64		41.9	16.6	3.71
Guo et al.2014	AH609	48.12	1.93	14.24	9.61	0.14	6.85	10.21	3.26	4.45	1.19	0.68	100.68		17.9	136.2	175.9	27.5	93.6	33.1	109.2	99.6	1406.0	21.7	351.0	52.4				1948.0	95.8	197.4	24.1	86.9	14.6	4.22	11.9	1.59	6.32	1.06	2.29	1.78	0.31	9.7	3.32		26.8	15.3	3.89
Guo et al.2014	AH602	47.11	2.51	14.10	9.99	0.15	8.46	8.68	3.32	4.41	1.25	0.66	100.64		27.6	157.8	172.3	31.7	98.4	42.5	114.3	109.2	1390.0	20.8	324.0	46.1				1896.0	116.2	217.8	22.4	86.5	14.9	4.13	11.3	1.37	5.63	0.97	2.48	1.69	0.26	11.5	3.56		34.1	14.8	3.86
Guo et al.2014	AH618	46.73	2.38	13.85	10.23	0.16	8.76	8.43	3.76	4.74	0.96	1.79	101.79		24.4	215.3	169.8	41.3	104.5	39.7	105.5	104.5	1471.0	22.4	305.0	49.6				2101.0	105.9	192.6	21.3	73.8	12.3	2.94	9.0	1.08	4.83	0.94	2.45	1.72	0.24	10.2	2.69		31.7	15.7	4.11
Guo et al.2014	AH615	47.40	2.17	14.55	10.37	0.17	9.04	7.27	3.44	4.52	1.06	2.05	102.04		28.3	190.6	229.5	35.2	113.8	38.3	132.6	110.6	1428.0	21.3	326.0	53.2				2014.0	103.6	204.2	23.7	92.3	15.1	4.09	12.7	1.57	6.39	1.01	2.56	1.91	0.35	8.9	3.93		41.0	13.9	3.46
Guo et al.2016	AH63	49.37	1.57	13.40	8.57	0.16	6.54	10.86	3.14	4.80	1.57	1.42	101.40		25.3	179.6	254.2	39.3	99.2	33.5	137.4	85.6	1289.0	18.7	282.0	12.8				1257.0	96.8	166.0	18.6	59.5	11.1	3.08	6.5	0.83	4.54	0.96	2.81	2.66	0.37	11.4	1.72		46.9	15.8	5.96
Guo et al.2016	AH-7	57.52	1.05	13.73	9.19	0.08	3.61	6.24	3.48	4.65	0.45	0.70	100.70		10.4	75.3	69.6	15.7	46.8	12.4	74.2	149.0	994.0	28.4	521.0	45.8				1755.0	187.0	376.0	38.9	118.0	20.4	3.73	12.9	1.67	7.95	1.33	2.93	2.65	0.40	13.5	2.19		36.2	34.2	4.49
Williams et al.2004	912	58.20	1.80	14.30	7.20	0.10	4.30	5.60	2.60	5.00	1.10	0.00	100.20		10.7	105.7	82.7	15.5	29.9	22.8	104.2	236.0	1387.4	27.4	600.1	45.1				2429.0	141.2	285.7	33.3	123.3	18.1	3.90	12.1	1.30	5.60	0.90	2.20	1.80	0.30	14.2	2.50		30.0	30.5	5.60
Williams et al.2004	1105	62.70	0.70	15.10	6.00	0.10	1.90	5.40	3.20	4.30	0.70		100.10		14.0	95.1	184.1	15.1	31.1	n.d.	n.d.	123.7	296.4	24.9	72.0	14.2				599.0	36.1	69.1	7.8	29.3	5.5	1.10	5.0	0.70	4.20	0.80	2.30	2.40	0.40	2.4	1.30		22.8	18.0	4.40
Williams et al.2004	K702	53.20	1.90	13.90	7.20	0.20	4.30	10.90	3.00	3.80	1.70	2.40	102.50		10.3	98.8	57.0	19.5	50.9	34.1	113.2	113.9	1216.6	28.1	432.5	43.6				2133.0	153.0	275.0	35.4	129.9	18.8	3.90	13.3	1.40	6.00	1.00	2.30	1.80	0.30	9.6	2.10		34.4	27.0	4.30
Williams et al.2004	K703	56.40	2.00	14.90	7.90	0.10	4.00	6.40	2.90	4.10	1.20	1.10	101.00		11.1	106.9	87.0	19.4	43.3	26.1	126.0	126.3	1176.6	31.7	532.0	49.5				2131.0	177.6	318.3	40.9	148.5	21.3	4.50	15.1	1.60	6.90	1.10	2.60	2.00	0.30	11.5	2.40		40.4	31.9	4.80
Cooper et al.2002	AKB-1	54.70	1.91	14.10	7.58	0.12	3.75	6.79	2.41	4.02	1.11	2.41	99.89		11.1		64.7	34.5			118.0	130.0	1196.0		485.0			0.07	3.14	2164.0	168.8	330.0		127.0	20.0	4.13		1.41				2.02	0.23	12.2	2.46			28.6	4.50
Cooper et al.2002	AKB-2	57.20	1.81	14.50	7.07	0.11	2.89	5.87	2.32	4.29	0.95	1.89	98.86		9.6		32.3	30.1			128.5	150.0	1201.0		557.0			0.06	5.32	2052.0	164.8	328.0		136.0	19.4	3.87		1.41				2.06	0.23	13.8	2.60			30.5	5.81
Cooper et al.2002	AKB-4	57.30	1.89	14.30	7.15	0.10	3.32	5.95	2.88	4.37	1.00	1.64	99.93
Cooper et al.2002	AKB-5	52.30	1.72	13.30	6.65	0.10	3.06	8.11	2.77	4.01	0.93	4.86	97.84
Cooper et al.2002	AKB-6	56.80	1.95	14.70	7.58	0.11	3.44	5.85	3.02	4.31	1.05	0.70	99.47
Cooper et al.2002	AKB-10	55.50	2.19	14.50	7.71	0.12	2.77	5.95	3.13	4.01	1.19	1.72	98.76		9.4		19.0	26.0			139.0	147.0	1274.0		647.0			0.03	2.62	2032.0	196.7	384.0		146.0	22.0	4.28		1.54				2.00	0.26	15.1	2.83			29.1	5.60
[truncated: 6 more columns]
